# Supplementary material
Source: Springer Nature journal article supplement (https://www.springermedizin.de/resource/supplementary/12889_2012_4464_MOESM1_ESM.pdf/9493122)

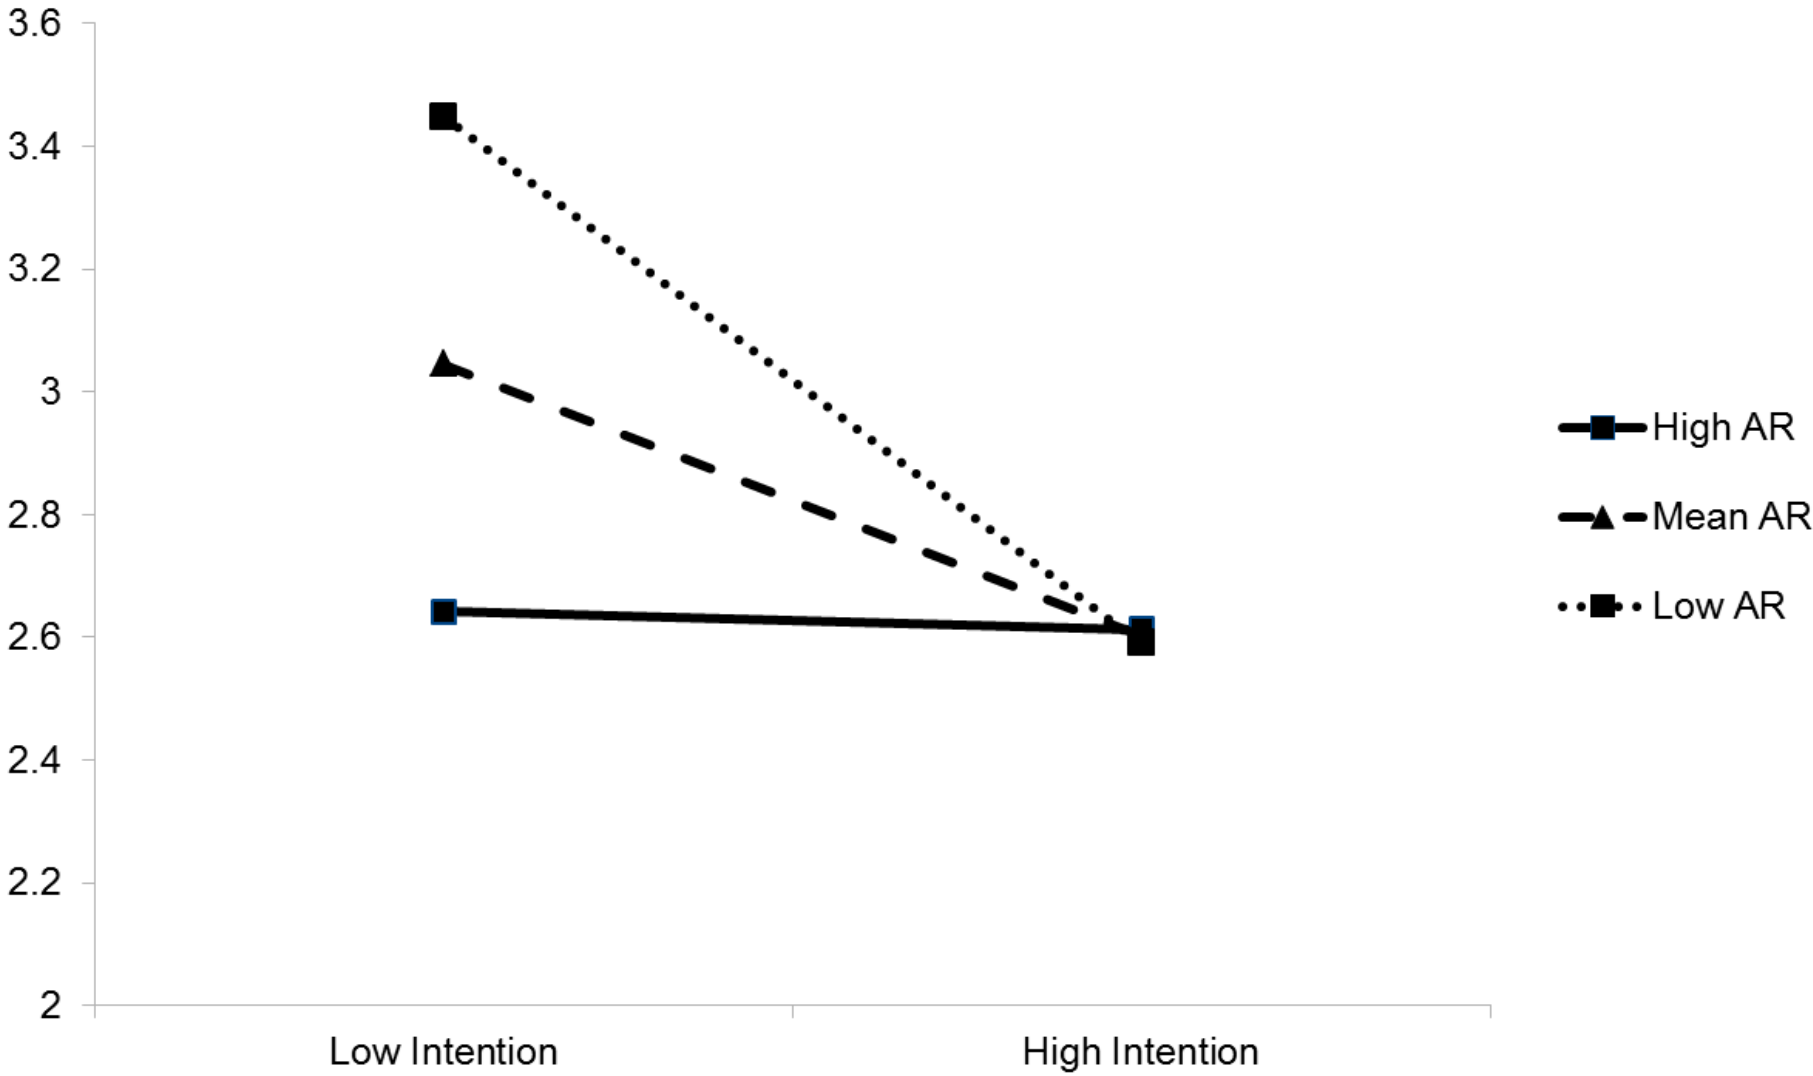

Supplement: MOESM1 [file 9493122]
